# Supplementary material
Source: ML conference proceedings conference paper supplement (https://openaccess.thecvf.com/content/CVPR2021/html/Wang_Dense_Contrastive_Learning_CVPR_2021_paper.html)
Supplement: Supplementary file 1 [file Wang_Dense_Contrastive_Learning_CVPR_2021_supplemental.pdf]

# Dense Contrastive Learning for Self-Supervised Visual Pre-Training Supplementary

## A. Implementation Details

**Dense projection head.** In our implementation, the dense projection head consists of adaptive average pooling (optional),  $1 \times 1$  convolution, ReLU, and  $1 \times 1$  convolution. Following [1, 2], the hidden layer’s dimension is 2048, and the final output dimension is 128.

**COCO learning rate.** For COCO pre-training including both baseline and ours, we use an initial learning rate of 0.3 instead of the original 0.03, as the former shows better performance in MoCo-v2 baseline when pre-training on COCO. The results are reported in Table 1.

| lr   | Detection |                  |                  | Classification |
|------|-----------|------------------|------------------|----------------|
|      | AP        | AP <sub>50</sub> | AP <sub>75</sub> | mAP            |
| 0.03 | 56.4      | 81.3             | 62.6             | 79.8           |
| 0.3  | 56.7      | 81.7             | 63.0             | 82.9           |

**Table 1 – Learning rate comparison.** The results are from 800-epoch COCO pre-trained MoCo-v2. The detection performance is evaluated by fine-tuning the pre-trained models on VOC0712. We also provide results of VOC2007 SVM Classification.

**Fine-tuning details.** We provide more details about evaluation by fine-tuning. For COCO object detection and segmentation with Mask R-CNN, we follow the settings in [8]. Synchronized batch normalization is used in backbone, FPN [5] and prediction heads during the training. For semantic segmentation, we evaluate the pre-trained models by fine-tuning an FCN-8s [6]. We follow the settings in mmsegmentation [7], except that the first  $7 \times 7$  convolution is kept to be consistent with the pre-trained models. Batch size is set to 16. Synchronized batch normalization is used. Crop size is 512 for VOC [4] and 769 for Cityscapes [3].

## B. Semi-Supervised Object Detection

In Table 2, we evaluate the pre-trained models on semi-supervised object detection. In this semi-supervised setting, only 10% training data is used during the fine-tuning. We evaluate by fine-tuning a Mask R-CNN (FPN backbone) for 90k iterations on COCO train2017 and tested on COCO val2017. DenseCL outperforms MoCo-v2 by 1.3% AP<sup>b</sup>

| pre-train         | AP <sup>b</sup> | AP <sup>b</sup> <sub>50</sub> | AP <sup>b</sup> <sub>75</sub> | AP <sup>m</sup> | AP <sup>m</sup> <sub>50</sub> | AP <sup>m</sup> <sub>75</sub> |
|-------------------|-----------------|-------------------------------|-------------------------------|-----------------|-------------------------------|-------------------------------|
| semi-supervised   |                 |                               |                               |                 |                               |                               |
| random init.      | 20.6            | 34.0                          | 21.5                          | 18.9            | 31.7                          | 19.8                          |
| super. IN         | 23.6            | 37.7                          | 25.4                          | 21.8            | 35.4                          | 23.2                          |
| MoCo-v2 CC        | 22.8            | 36.4                          | 24.2                          | 20.9            | 34.6                          | 21.9                          |
| <b>DenseCL CC</b> | 24.1            | 38.1                          | 25.6                          | 21.9            | 36.0                          | 23.0                          |
| MoCo-v2 IN        | 23.8            | 37.5                          | 25.6                          | 21.8            | 35.4                          | 23.2                          |
| <b>DenseCL IN</b> | 24.8            | 38.8                          | 26.8                          | 22.6            | 36.8                          | 23.9                          |
| fully-supervised  |                 |                               |                               |                 |                               |                               |
| MoCo-v2 CC        | 38.5            | 58.1                          | 42.1                          | 34.8            | 55.3                          | 37.3                          |
| <b>DenseCL CC</b> | 39.6            | 59.3                          | 43.3                          | 35.7            | 56.5                          | 38.4                          |
| MoCo-v2 IN        | 39.8            | 59.8                          | 43.6                          | 36.1            | 56.9                          | 38.7                          |
| <b>DenseCL IN</b> | 40.3            | 59.9                          | 44.3                          | 36.4            | 57.0                          | 39.2                          |

**Table 2 – Semi-supervised object detection and instance segmentation fine-tuned on COCO.** During the fine-tuning, only 10% training data is used. ‘CC’ and ‘IN’ indicate the pre-training models trained on COCO and ImageNet respectively. All the detectors are trained on train2017 for 90k iterations and evaluated on val2017. The metrics include bounding box AP (AP<sup>b</sup>) and mask AP (AP<sup>m</sup>).

and 1.0% AP<sup>b</sup> when pre-training on COCO and ImageNet respectively. It should be noted that the gains are more significant than that of the fully-supervised setting which uses all of  $\sim 118k$  images during the fine-tuning. For example, when pre-training on ImageNet, DenseCL surpasses MoCo-v2 by 1.0% AP<sup>b</sup> and 0.5% AP<sup>b</sup> for semi-supervised setting and fully-supervised setting respectively.

## C. Visualization

Given two views of the same image, we use the pre-trained backbone to extract the features  $F_1$  and  $F_2$ . For each feature vector in  $F_1$ , we find the corresponding feature vector in  $F_2$  which has the highest cosine similarity. The match is kept if the same match holds from  $F_2$  to  $F_1$ . Each match is assigned an averaged similarity. In Figure 1, we visualize the high-similarity matches (*i.e.*, similarity  $\geq 0.9$ ). DenseCL extracts many more high-similarity matches than its baseline. It is in accordance with our intention that the local features extracted from the two views of the same image should be similar.

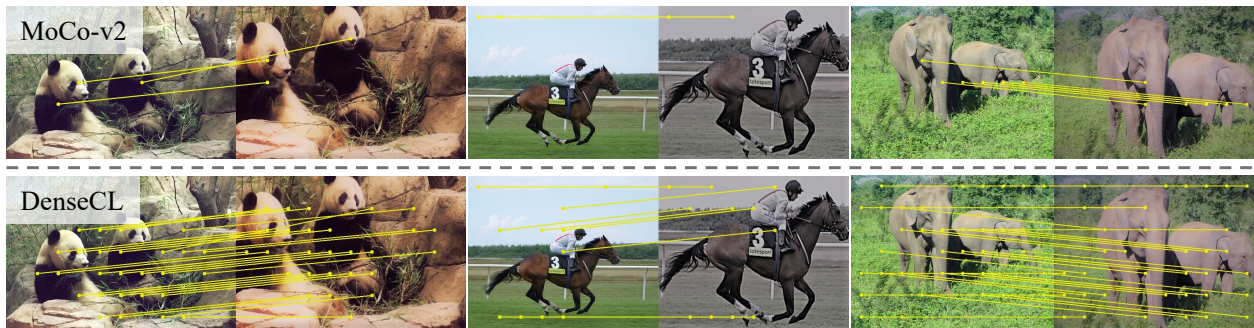

**Figure 1** – Visualization of dense correspondence. The correspondence is extracted between two views of the same image, using the 200-epoch ImageNet pre-trained model. DenseCL extracts more high-similarity matches compared with MoCo-v2. Best viewed on screen.

## References

- [1] Ting Chen, Simon Kornblith, Mohammad Norouzi, and Geoffrey Hinton. A simple framework for contrastive learning of visual representations. In *Proc. Int. Conf. Mach. Learn.*, 2020. [1](#)
- [2] Xinlei Chen, Haoqi Fan, Ross Girshick, and Kaiming He. Improved baselines with momentum contrastive learning. *arXiv: Comp. Res. Repository*, 2020. [1](#)
- [3] Marius Cordts, Mohamed Omran, Sebastian Ramos, Timo Rehfeld, Markus Enzweiler, Rodrigo Benenson, Uwe Franke, Stefan Roth, and Bernt Schiele. The cityscapes dataset for semantic urban scene understanding. In *Proc. IEEE Conf. Comp. Vis. Patt. Recogn.*, pages 3213–3223, 2016. [1](#)
- [4] Mark Everingham, Luc Van Gool, Christopher KI Williams, John Winn, and Andrew Zisserman. The PASCAL Visual Object Classes (VOC) Challenge. *Int. J. Comput. Vision*, 88(2):303–338, 2010. [1](#)
- [5] Tsung-Yi Lin, Piotr Dollár, Ross B. Girshick, Kaiming He, Bharath Hariharan, and Serge J. Belongie. Feature pyramid networks for object detection. In *Proc. IEEE Conf. Comp. Vis. Patt. Recogn.*, 2017. [1](#)
- [6] Jonathan Long, Evan Shelhamer, and Trevor Darrell. Fully convolutional networks for semantic segmentation. In *Proc. IEEE Conf. Comp. Vis. Patt. Recogn.*, pages 3431–3440, 2015. [1](#)
- [7] OpenMMLab. mmsegmentation. <https://github.com/open-mmlab/msegmentation>, 2020. [1](#)
- [8] Yonglong Tian, Chen Sun, Ben Poole, Dilip Krishnan, Cordelia Schmid, and Phillip Isola. What makes for good views for contrastive learning. In *NeurIPS*, 2020. [1](#)
